# Supplementary material for: Meta gene set enrichment analyses link miR-137-regulated pathways with schizophrenia risk
Source: Front Genet. 2015 Apr 20;6:147. doi: 10.3389/fgene.2015.00147 (PMC4403556; doi:10.3389/fgene.2015.00147)
Supplement: Supplementary file 5 [file Table5.XLSX]

## Sheet: Sheet4
	Supplemental Table 5. Top SNP for each corresponding gene within each gene set significantly enriched with schizophrenia risk variants
	Dataset	PGC		PGC		PGC		PGC		PGC		PGC		PGC		PGC		PGC		PGC		PGC		PGC		PGC		PGC		PGC		PGC		PGC		PGC		PGC		PGC		MCIC/NU
	List	Full List		Full List		Full List		Intersection List		Intersection List		Intersection List		Intersection List		Conserved List		Conserved List		Conserved List		Conserved List		Conserved List		Context List		Context List		Context List		Context List		Validated List		Validated List		Validated List		Validated List		Validated List
	Gene set	PKA Signaling		EphrinReceptorSignaling		AxonalGuidanceSignaling		SertoliCellSignaling		IntersectionListTargets		EphrinReceptorSignaling		AxonalGuidanceSignaling		AxonalGuidanceSignaling		EphrinReceptorSignaling		ConservedListTargets		LongTermPotentiation		SertoliCellSignaling		AxonalGuidanceSignaling		EphrinReceptorSignaling		ContextListTargets		SertoliCellSignaling		LongTermPotentiation		MechanimsofCancer		SertoliCellSignaling		PKA Signaling		PKA Signaling
		Gene Symbol	SNP ID	Gene Symbol	SNP ID	Gene Symbol	SNP ID	Gene Symbol	SNP ID	Gene Symbol	SNP ID	Gene Symbol	SNP ID	Gene Symbol	SNP ID	Gene Symbol	SNP ID	Gene Symbol	SNP ID	Gene Symbol	SNP ID	Gene Symbol	SNP ID	Gene Symbol	SNP ID	Gene Symbol	SNP ID	Gene Symbol	SNP ID	Gene Symbol	SNP ID	Gene Symbol	SNP ID	Gene Symbol	SNP ID	Gene Symbol	SNP ID	Gene Symbol	SNP ID	Gene Symbol	SNP ID	Gene Symbol	SNP ID
		ADCY1	rs7456393	AKT2	rs7507651	AKT2	rs7507651	AKT2	rs7507651	SERPINA3	rs11622033	AKT2	rs7507651	AKT2	rs7507651	AKT2	rs7507651	AKT2	rs7507651	SERPINA3	rs11622033	ADCY1	rs7456393	AKT2	rs7507651	AKT2	rs7507651	AKT2	rs7507651	SERPINA3	rs11622033	ACTN2	rs7544174	CACNA1C	rs9888368	CDC42	rs4654783	CDC42	rs4654783	MAPK1	rs240065	MAPK1	rs9610608
		ADCY2	rs10462842	CDC42	rs4654783	BMP7	rs4811823	CDC42	rs4654783	AFM	rs2051512	CDC42	rs4654783	CDC42	rs4654783	CDC42	rs4654783	CDC42	rs4654783	ACTN2	rs7544174	CACNA1C	rs9888368	CDC42	rs4654783	CDC42	rs4654783	CDC42	rs4654783	ACTN2	rs7544174	AKT2	rs7507651	MAPK1	rs240065	CDK2	rs17118200	CLDN11	rs11711130	MAPK3	rs3814878	MAPK3	rs7202714
		ADCY9	rs12443863	CFL2	rs10132688	CDC42	rs4654783	CLDN11	rs11711130	AKT2	rs7507651	EPHA5	rs11735820	EPHA5	rs11735820	CRKL	rs5761551	CRKL	rs5761551	AFM	rs2051512	CALM1	rs8181936	GSK3B	rs13088757	EPHA5	rs11735820	EPHA5	rs11735820	AFM	rs2051512	CDC42	rs4654783	MAPK3	rs3814878	CDK6	rs41415148	MAPK1	rs240065	PTGS2	rs10911901	PTGS2	rs10489401
		CALM1	rs8181936	CRKL	rs5761551	CFL2	rs10132688	PRKAR2B	rs10953524	SLC25A5	NaN	EPHA7	rs13203837	EPHA7	rs13203837	EFNA2	rs3764641	EFNA2	rs3764641	AHR	rs11971406	CALM2	rs904166	GUCY1A2	rs2171460	EPHA7	rs13203837	EPHA7	rs13203837	AHR	rs11971406	MAP3K1	rs12658073			E2F6	rs12614218	MAPK3	rs3814878	TCF4	rs9964328	TCF4	rs2276195
		CALM2	rs904166	EFNA2	rs3764641	CRKL	rs5761551	MAPK1	rs240065	SHROOM2	NaN	GNAT1	rs3774734	GNAT1	rs3774734	EPHA5	rs11735820	EPHA5	rs11735820	AKT2	rs7507651	CALM3	rs11083830	CLDN11	rs11711130	GNAT1	rs3774734	GNAT1	rs3774734	AKT2	rs7507651	CLDN11	rs11711130			MAPK1	rs240065
		CALM3	rs11083830	EFNA3	rs16836580	EFNA2	rs3764641	MAPK3	rs3814878	ARHGAP5	rs17091610	NCK1	rs8179900	NCK1	rs8179900	EPHA7	rs13203837	EPHA7	rs13203837	SLC25A5	NaN	CAMK2A	rs2240785	PRKAR2B	rs10953524	NCK1	rs8179900	GRIN2A	rs1861192	SLC25A5	NaN	PRKAR2B	rs10953524			MAPK3	rs3814878
		CAMK2A	rs2240785	EFNB2	rs9520090	EFNA3	rs16836580	MAPK10	rs10856856	ASPH	rs6471964	MAPK1	rs240065	PRKAR2B	rs10953524	EPHA8	rs209713	EPHA8	rs209713	SHROOM2	NaN	GRIA1	rs6882589	MAPK1	rs240065	PRKAR2B	rs10953524	NCK1	rs8179900	SHROOM2	NaN	MAPK1	rs240065			RB1	rs2854344
		DUSP4	rs10503840	EPHA5	rs11735820	EFNB2	rs9520090	SRC	rs879818	ZFP36L2	rs6544630	MAPK3	rs3814878	MAPK1	rs240065	GNAT1	rs3774734	GNAT1	rs3774734	TRIM23	rs40198	GRIA4	rs4576793	MAPK3	rs3814878	MAPK1	rs240065	MAPK1	rs240065	TRIM23	rs40198	MAPK3	rs3814878			TCF4	rs9964328
		DUSP5	rs4918503	EPHA7	rs13203837	EPHA5	rs11735820	TJP1	rs4780264	CA7	rs16956948	CXCL12	rs1253941	MAPK3	rs3814878	GSK3B	rs13088757	NCK1	rs8179900	ARHGAP5	rs17091610	PPP1CB	rs4666116	MAPK10	rs10856856	MAPK3	rs3814878	MAPK3	rs3814878	ARHGAP5	rs17091610	MAPK10	rs10856856
		DUSP8	rs7116333	EPHA8	rs209713	EPHA7	rs13203837	CSDA	rs2290717	CACNA1C	rs9888368	SRC	rs879818	CXCL12	rs1253941	NCK1	rs8179900	MAPK1	rs240065	ASPH	rs6471964	PRKAR2B	rs10953524	PVRL1	rs11217470	CXCL12	rs1253941	CXCL12	rs1253941	ASPH	rs6471964	SRC	rs879818
		GSK3B	rs13088757	EPHB3	rs4912572	EPHA8	rs209713	ZAK	rs1530591	CALM1	rs8181936			PIK3R3	rs10890384	NFATC1	rs9945016	MAPK3	rs3814878	ATP1B1	rs3766034	MAPK1	rs240065	MAP2K4	rs8064513	WNT7A	rs17038695	SRC	rs879818	ATP1B1	rs3766034	TJP1	rs4780264
		H3F3A	rs10915923	GNAT1	rs3774734	EPHB3	rs4912572			CALM2	rs904166			SEMA4D	rs3211669	PRKAR2B	rs10953524	PXN	rs2286050	ATP2B2	rs7619994	MAPK3	rs3814878	SRC	rs879818	PIK3R3	rs10890384	MAP3K14	rs9895436	ATP2B2	rs7619994	CSDA	rs2290717
		H3F3B	rs3744000	GRIN2A	rs1861192	GNAT1	rs3774734			CALM3	rs11083830			GLIS2	rs804175	MAPK1	rs240065	CXCL12	rs1253941	PRDM1	rs12175062	CREB5	rs7803931	TJP1	rs4780264	ADAM23	rs9679697			BAI3	rs9454667	MAP3K14	rs9895436
		MAP3K1	rs12658073	ITGA5	rs4758960	GSK3B	rs13088757			CCNG2	rs7659891					MAPK3	rs3814878	SRC	rs879818	BNIP2	rs6151568			CSDA	rs2290717	ARHGEF7	rs9555787			PRDM1	rs12175062	ZAK	rs1530591
		NFATC1	rs9945016	NCK1	rs8179900	ITGA5	rs4758960			CDC42	rs4654783					PXN	rs2286050	CREB5	rs7803931	ZFP36L2	rs6544630			MAP3K13	rs1062553	SEMA4D	rs3211669			BNIP2	rs6151568	CLDN22	rs17294373
		PDE4A	rs2304254	MAPK1	rs240065	NCK1	rs8179900			CDK2	rs17118200					CXCL12	rs1253941	GNA13	rs35020254	CA7	rs16956948			ZAK	rs1530591	PLCB1	rs4813863			ZFP36L2	rs6544630
		PDE4D	rs3805557	MAPK3	rs3814878	NFATC1	rs9945016			CDK6	rs41415148					PIK3R3	rs10890384			CACNA1C	rs9888368					PRKD3	rs10170761			TMEM50B	rs12329794
		PDE7A	rs13275168	PXN	rs2286050	PLXNA2	rs17011832			RCC1	rs11247811					GNA13	rs35020254			CACNB2	rs11013415					GLIS2	rs804175			CA7	rs16956948
		PDE1B	rs2280426	RAC1	rs10238136	PRKAR2B	rs10953524			FOXN3	rs8018966					GLIS2	rs804175			CALM1	rs8181936									CACNA1C	rs9888368
		PRKAR2B	rs10953524	AXIN1	rs2685127	PXN	rs2286050			COL5A1	rs7044529									CAPN2	rs4653518									CALM2	rs904166
		MAPK1	rs240065	MAP3K14	rs9895436	RAC1	rs10238136			COL19A1	rs3778241									CCNG2	rs7659891									CALM3	rs11083830
		MAPK3	rs3814878	CREB5	rs7803931	CXCL12	rs1253941			CTBP1	rs7669287									CD69	rs10772137									CAPN2	rs4653518
		PTGS2	rs10911901	GNA13	rs35020254	WNT7A	rs17038695			CUX1	rs12668796									CDC42	rs4654783									CCNG2	rs7659891
		PTPN2	rs4797718			SEMA3B	rs2526388			CXADR	rs2824321									CDK2	rs17118200									CD69	rs10772137
		PTPN14	rs6693492			FZD3	rs7007096			DFFB	rs10909819									CDK6	rs41415148									CDC42	rs4654783
		PTPRD	rs10809041			PIK3R3	rs10890384			COCH	rs10431648									RCC1	rs11247811									CDH8	rs12103220
		PXN	rs2286050			ADAM23	rs9679697			TSC22D3	NaN									FOXN3	rs8018966									CDK2	rs17118200
		RYR2	rs2250036			ADAM15	rs16836580			DSP	rs9791270									CHM	NaN									CDK6	rs41415148
		RYR3	rs7169713			NRP1	rs2804468			DTNA	rs1357162									AP3S1	rs13174348									RCC1	rs11247811
		TCF4	rs9964328			ARHGEF7	rs9555787			DUSP4	rs10503840									COL5A1	rs7044529									FOXN3	rs8018966
		TCF3	rs2668433			SRGAP3	rs1533000			DUSP5	rs4918503									COL19A1	rs3778241									CHM	NaN
		CREB5	rs7803931			SEMA4D	rs3211669			DUSP8	rs7116333									CSE1L	rs6019602									AP3S1	rs13174348
		GNA13	rs35020254			GNA13	rs35020254			E2F6	rs12614218									CSNK1G3	rs13170938									COL5A1	rs7044529
		PDE10A	rs220776			SHANK2	rs7937478			EPHA5	rs11735820									CTBP1	rs7669287									COL19A1	rs3778241
		KDELR3	rs196054			PLCB1	rs4813863			EPHA7	rs13203837									CUX1	rs12668796									CSE1L	rs6019602
		PTP4A3	rs7828326			PLXNB2	rs35847018			ESRRA	rs11231726									CXADR	rs2824321									CSNK1G3	rs13170938
		AKAP2	rs10816922			PRKD3	rs10170761			ESRRG	rs7550505									DGKG	rs4615068									CTBP1	rs7669287
		DUSP10	rs6687398			PRKAG2	rs7455706			EZH2	rs9986856									DDX3X	NaN									CUX1	rs12668796
		PLCB1	rs4813863			PLXNA3	NaN			FGF11	rs17882626									DFFB	rs10909819									CXADR	rs2824321
		PRKD3	rs10170761			GLIS2	rs804175			GABRA1	rs10068980									COCH	rs10431648									DGKG	rs4615068
		PPP1R14B	rs11231726							GALNT1	rs16967009									DR1	rs17131710									DDX3X	NaN
		PRKAG2	rs7455706							GBP3	rs6657572									TSC22D3	NaN									DFFB	rs10909819
		PTPN5	rs4073915							GNAT1	rs3774734									DSP	rs9791270									COCH	rs10431648
		PALM2	rs10980097							GOLGA3	rs11147164									DTNA	rs1357162									DR1	rs17131710
		PALM2-AKAP2								GRK6	rs461264									DUSP4	rs10503840									TSC22D3	NaN
										GPX7	rs1416094									DUSP5	rs4918503									DSP	rs9791270
	This table shows the top SNP rs IDs as determined by MAGENTA for each usable gene within each significantly risk associated miR-137 potential target geneset. NaN indicates genes that did not have SNP coverage in our dataset.									H3F3A	rs10915923									DVL2	rs2654185									DTNA	rs1357162
										H3F3B	rs3744000									E2F6	rs12614218									DUSP4	rs10503840
										HTT	rs7677445									MEGF9	rs10984974									DUSP5	rs4918503
										HIC1	rs6503222									EGR2	rs1509963									DUSP8	rs7116333
										HK3	rs4976630									EIF2S3	NaN									DVL2	rs2654185
										HLF	rs17817995									EPHA5	rs11735820									E2F6	rs12614218
										HTR2C	NaN									EPHA7	rs13203837									MEGF9	rs10984974
										INPP5A	rs7914354									ERG	rs2836455									EGR2	rs1509963
										KIT	rs7695300									ESRRA	rs11231726									EIF2S3	NaN
										LCP2	rs703506									ESRRG	rs7550505									EPHA5	rs11735820
										SMCP	rs7517755									EZH2	rs9986856									EPHA7	rs13203837
										MET	rs729949									MS4A2	rs11825653									ERG	rs2836455
										MITF	rs10510985									FGF9	rs6490667									ESRRA	rs11231726
										MPP1	NaN									FKBP1A	rs6078807									ESRRG	rs7550505
										MSI1	rs206950									GABRA1	rs10068980									EZH2	rs9986856
										MTF1	rs655055									GALNT1	rs16967009									FBN2	rs27855
										MYO1D	rs9890602									GBP3	rs6657572									MS4A2	rs11825653
										NAB2	rs17546579									GLS	rs7584605									FGF9	rs6490667
										NCK1	rs8179900									GNAT1	rs3774734									FGF11	rs17882626
										NEFL	rs999574									GOLGA3	rs11147164									FKBP1A	rs6078807
										NEUROD2	rs1565922									GPD2	rs6721605									GABRA1	rs10068980
										NF1	rs2952989									GPX7	rs1416094									GALNT1	rs16967009
										NOTCH1	rs10781497									GRIN2A	rs1861192									GBP3	rs6657572
										NSF	rs35732828									H3F3A	rs10915923									GLS	rs7584605
										CLDN11	rs11711130									H3F3B	rs3744000									GNAT1	rs3774734
										FURIN	rs16944884									HTT	rs7677445									GOLGA3	rs11147164
										PFKFB4	rs35452137									HIC1	rs6503222									GPD2	rs6721605
										POLR2C	rs1273584									HK3	rs4976630									GRK6	rs461264
										PPP1CB	rs4666116									HLF	rs17817995									GPX7	rs1416094
										PRKAA1	rs7725810									HTR2C	NaN									GRIN2A	rs1861192
										PRKAB2	rs4950392									IGFBP5	rs6413493									H3F3A	rs10915923
										PRKAR2B	rs10953524									ING2	rs17294373									H3F3B	rs3744000
										MAPK1	rs240065									INPP5A	rs7914354									HTT	rs7677445
										MAPK3	rs3814878									KCNA2	rs6656346									HIC1	rs6503222
										MAPK10	rs10856856									KCND2	rs4730972									HK3	rs4976630
										PTBP1	rs7247331									KIT	rs7695300									HLF	rs17817995
										PTGFRN	rs798055									LCP2	rs703506									HOXC4	rs2204785
										PTGS2	rs10911901									MAX	rs10873180									HOXD10	rs11891328
										PTN	rs10268599									SMCP	rs7517755									HTR2C	NaN
										PTPN14	rs6693492									MAP3K1	rs12658073									IGFBP5	rs6413493
										RB1	rs2854344									MET	rs729949									ING2	rs17294373
										RNF4	rs3128816									MITF	rs10510985									INPP5A	rs7914354
										RORA	rs2433025									MPP1	NaN									KCNA2	rs6656346
										RPL15	rs7622887									MSI1	rs206950									KCND2	rs4730972
										RPL28	rs2891577									MTF1	rs655055									KIT	rs7695300
										RREB1	rs2256596									MYO1C	rs7211395									LCP2	rs703506
										CXCL12	rs1253941									MYO1D	rs9890602									MARK3	rs3742458
										SGCG	rs11619207									NAB2	rs17546579									MAX	rs10873180
										ST3GAL3	rs1065772									NCK1	rs8179900									SMCP	rs7517755
										SLC6A8	NaN									NEFH	rs165607									MAP3K1	rs12658073
										SLC6A9	rs4448553									NEFL	rs999574									MET	rs729949
										SLC12A2	rs7723104									NEUROD1	rs10497585									MITF	rs10510985
										HLTF	rs751845									NEUROD2	rs1565922									MPP1	NaN
										SRC	rs879818									NF1	rs2952989									MSI1	rs206950
										ST13	rs739273									NOTCH1	rs10781497									MTF1	rs655055
										AURKA	rs7260863									NOVA1	rs2144336									MYO1C	rs7211395
										TBCE	rs6699644									YBX1	rs7411957									MYO1D	rs9890602
										TCF4	rs9964328									NSF	rs35732828									NAB2	rs17546579
										TBX3	rs11067272									CLDN11	rs11711130									NCK1	rs8179900
										TFAP2A	rs796294									FURIN	rs16944884									NEFH	rs165607
										TJP1	rs4780264									CNTN3	rs6765674									NEFL	rs999574
										TRAF3	rs2144825									PDCL	rs16912258									NEUROD1	rs10497585
										TSNAX	rs7556048									PCDH9	rs11148709									NEUROD2	rs1565922
										UBE2G1	rs17764245									PDE1B	rs2280426									NF1	rs2952989
										SLC30A4	rs1153829									PFKFB4	rs35452137									NFYC	rs2769256
										NCOA3	rs3859587									POLR2C	rs1273584									NOTCH1	rs10781497
										CDC42BPA	rs12724703									MED1	rs12947620									NOVA1	rs2144336
										PIK3R3	rs10890384									PPP1CB	rs4666116									YBX1	rs7411957
										CSDA	rs2290717									PRKAA1	rs7725810									NSF	rs35732828
										IRS2	rs1411552									PRKAB2	rs4950392									CLDN11	rs11711130
										B3GALT2	rs12132411									PRKAR2B	rs10953524									FURIN	rs16944884
										ALDH1A2	rs2704230									MAPK1	rs240065									CNTN3	rs6765674
										CPNE1	rs6119625									MAPK3	rs3814878									PDCL	rs16912258
										CACNA1I	rs132579									MAPK10	rs10856856									PCDH9	rs11148709
										HERC3	rs4585264									PTBP1	rs7247331									PDE1B	rs2280426
										MBD2	rs1259844									PTGFRN	rs798055									PFKFB4	rs35452137
										BTAF1	rs1589066									PTGS2	rs10911901									POLR2C	rs1273584
										SLC16A6	rs1558877									PTN	rs10268599									MED1	rs12947620
										KLF4	rs1832741									PTPN2	rs4797718									PPP1CB	rs4666116
										NRXN1	rs6736816									PTPN14	rs6693492									PRKAA1	rs7725810
										MED27	rs7858174									RANBP2	rs17036552									PRKAB2	rs4950392
										SLC4A7	rs6551196									RB1	rs2854344									PRKAR2B	rs10953524
										NRG2	rs13175054									RBBP6	rs17761993									MAPK1	rs240065
										RGS6	rs36341									RNASE6	rs10138629									MAPK3	rs3814878
										MTFR1	rs1053087									RNF4	rs3128816									MAPK10	rs10856856
										ZNF516	rs6565887									RNF6	rs7997534									PTBP1	rs7247331
										JMJD2A	rs1065772									RORA	rs2433025									PTGFRN	rs798055
										ProSAPiP1	rs2295547									RPL15	rs7622887									PTGS2	rs10911901
										ZFYVE16	rs259043									RPL28	rs2891577									PTN	rs10268599
										RAPGEF5	rs1859742									RREB1	rs2256596									PTPN2	rs4797718
										MAML1	rs4700839									RYR2	rs2250036									PTPN14	rs6693492
										RHOBTB1	rs10994530									CXCL12	rs1253941									RANBP2	rs17036552
										RICH2	rs3213687									SGCG	rs11619207									RB1	rs2854344
										HNRPDL	rs11722069									SGK1	rs1057293									RBBP6	rs17761993
										PDCD6	rs1053477									ST3GAL3	rs1065772									RNASE6	rs10138629
										ABCC9	rs4148677									SLC1A5	rs3786704									RNF4	rs3128816
										CTDSP2	rs10747787									SLC6A8	NaN									RNF6	rs7997534
										RBM12	rs11696527									SLC6A9	rs4448553									RORA	rs2433025
										SERF2	rs11070408									SLC12A2	rs7723104									RPL15	rs7622887
										KCNMB2	rs11714907									HLTF	rs751845									RPL28	rs2891577
										NCOA2	rs10504473									SRC	rs879818									RREB1	rs2256596
										SEMA4D	rs3211669									SSR1	rs2256596									RYR2	rs2250036
										SPTLC1	rs16908135									SS18	rs684873									CXCL12	rs1253941
										SLC35A1	rs11965562									ST13	rs739273									SGCG	rs11619207
										PAIP1	rs3776423									STAC	rs6775328									SGK1	rs1057293
										DMRT2	rs1890838									STK3	rs4236852									ST3GAL3	rs1065772
										JARID1B	rs3196669									AURKA	rs7260863									SLC1A5	rs3786704
										FRS2	rs10878977									SYT1	rs2272500									SLC6A8	NaN
										PPARGC1A	rs3796407									TBCE	rs6699644									SLC6A9	rs4448553
										RALBP1	rs7232664									TCF4	rs9964328									SLC12A2	rs7723104
										GLIPR1	rs3741495									TBX3	rs11067272									HLTF	rs751845
										TMSL8	NaN									TCF3	rs2668433									SRC	rs879818
										RAB35	rs2286050									TCF12	rs1037958									SSR1	rs2256596
										POLS	rs2288446									TFAP2A	rs796294									SS18	rs684873
										C9orf7	rs1054379									TFAP2C	rs2296130									ST13	rs739273
										AKAP2	rs10816922									TGFA	rs17005940									STAC	rs6775328
										RASSF8	rs10771260									TJP1	rs4780264									STK3	rs4236852
										KLF12	rs1184596									GPR137B	rs16833272									AURKA	rs7260863
										STK38	rs16888605									TMPO	rs10492291									SYT1	rs2272500
										CTRC	rs542008									TNFAIP1	rs241783									TBCE	rs6699644
										KIAA0831	rs7141290									TRAF3	rs2144825									TCF4	rs9964328
										KIAA0907	rs4661175									TRPS1	rs800536									TBX3	rs11067272
										ZNF365	rs7073867									TSN	rs7559417									TCF3	rs2668433
										AOF2	rs2765854									TSNAX	rs7556048									TCF12	rs1037958
										TNRC6B	rs11914082									TWIST1	rs11979137									TFAP2A	rs796294
										NFASC	rs17415523									UBE2G1	rs17764245									TFAP2C	rs2296130
										ZC3H3	rs11136295									UGP2	rs36099158									TGFA	rs17005940
										GRAMD4	rs17589429									WNT7A	rs17038695									TJP1	rs4780264
										EFR3A	rs7840213									ZNF217	rs2766664									GPR137B	rs16833272
										FBXL7	rs13185548									SLC30A4	rs1153829									TMPO	rs10492291
										MLC1	rs137880									SLMAP	rs11713595									TNFAIP1	rs241783
										TBC1D1	rs13107094									NCOA3	rs3859587									TRAF3	rs2144825
										TBC1D12	rs1889486									CUL4A	rs3093248									TRPS1	rs800536
										ANKRD28	rs9832792									CDC42BPA	rs12724703									TSN	rs7559417
										ANKRD12	rs11660603									PIK3R3	rs10890384									TSNAX	rs7556048
										CLEC16A	rs11645951									CSDA	rs2290717									TWIST1	rs11979137
										ARHGEF18	rs11882682									CADPS	rs17687440									UBE2G1	rs17764245
										AHCYL2	rs1077483									IRS2	rs1411552									UBE2H	rs2708639
										TARDBP	rs2273346									B3GALT2	rs12132411									UGP2	rs36099158
										HEY2	rs6940469									CTSF	rs618838									WNT7A	rs17038695
										AMACR	rs2113097									ADAM23	rs9679697									ZNF217	rs2766664
										CD2AP	rs6938470									ALDH1A2	rs2704230									SLC30A4	rs1153829
										SSBP3	rs7536329									APLN	NaN									SLMAP	rs11713595
										HYPK	rs11070408									ARHGEF7	rs9555787									NCOA3	rs3859587
										NIPBL	rs168662									CPNE1	rs6119625									SYN3	rs135026
										NECAP1	rs10772929									CACNA1I	rs132579									CUL4A	rs3093248
										GORASP2	rs6755814									CACNA1G	rs2240219									CDC42BPA	rs12724703
										EIF2C1	rs12725400									HERC3	rs4585264									PIK3R3	rs10890384
										CHORDC1	rs10734123									MBD2	rs1259844									CSDA	rs2290717
										SERP1	rs4533673									MAP3K14	rs9895436									CADPS	rs17687440
										TOR1B	rs10988496									BTAF1	rs1589066									TP63	rs7616437
										FAM152B	rs9623433									PIAS2	rs7238423									IRS2	rs1411552
										HIPK2	rs10226879									SLC16A6	rs1558877									B3GALT2	rs12132411
										ZNF295	rs220215									ZMYM5	rs9579706									CTSF	rs618838
										TMED5	rs17131710									DLGAP1	rs1133851									ADAM23	rs9679697
										ZBTB7B	rs10908445									CD83	rs3799925									ALDH1A2	rs2704230
										METTL9	rs8045456									KLF4	rs1832741									APLN	NaN
										PRR16	rs7710004									C5orf13	rs27933									ARHGEF7	rs9555787
										ZBTB7A	rs2379623									HMGN3	rs4706760									CPNE1	rs6119625
										MBTPS2	NaN									RAB9A	NaN									CACNA1I	rs132579
										DCDC2	rs7738943									NRXN3	rs17835152									CACNA1G	rs2240219
										C20orf111	rs6017279									NRXN1	rs6736816									HERC3	rs4585264
										C7orf28A	rs28404743									MED27	rs7858174									MBD2	rs1259844
										SELT	rs4533673									SH3BP5	rs7651842									MAP3K14	rs9895436
										ZAK	rs1530591									CHST10	rs12614705									HIP1R	rs2271050
										C21orf91	rs8131431									SLC4A7	rs6551196									BTAF1	rs1589066
										GPR85	rs10279164									BAG4	rs2843745									PIAS2	rs7238423
										TAF7L	NaN									NRG2	rs13175054									SLC16A6	rs1558877
										XRN1	rs9867210									RGS6	rs36341									ZMYM5	rs9579706
										SGTB	rs16894342									MTFR1	rs1053087									DLGAP1	rs1133851
										DIRAS2	rs753593									ZNF516	rs6565887									CD83	rs3799925
										C10orf26	rs7907703									JMJD2A	rs1065772									KLF4	rs1832741
										SNRK	rs6793392									UBE3C	rs6979196									C5orf13	rs27933
										ZCCHC2	rs8097062									ST18	rs4873639									HMGN3	rs4706760
										RIC8B	rs3782709									ProSAPiP1	rs2295547									RAB9A	NaN
										SBNO1	rs1879379									ZFYVE16	rs259043									NRXN3	rs17835152
										RAVER2	rs12402976									RAPGEF5	rs1859742									NRXN1	rs6736816
										RBM41	NaN									MAML1	rs4700839									MED27	rs7858174
										IMPACT	rs10163707									KIAA0133	rs6701445									SH3BP5	rs7651842
										CDCA7L	rs13242846									RHOBTB1	rs10994530									CHST10	rs12614705
										PPP1R9A	rs1326152									RICH2	rs3213687									SLC4A7	rs6551196
										CISD1	rs2153281									HNRPDL	rs11722069									BAG4	rs2843745
										NXT2	NaN									PDCD6	rs1053477									NRG2	rs13175054
										CTTNBP2NL	rs1343275									INSL5	rs604737									RGS6	rs36341
										RP5-1022P6.2	rs805755									RANBP9	rs365178									MTFR1	rs1053087
										CEACAM19	rs2965157									GJC1	rs4369727									ZNF516	rs6565887
										KIAA1147	rs9942597									ABCC9	rs4148677									JMJD2A	rs1065772
										ABHD6	rs12632456									EDIL3	rs11948928									GREB1	rs10929757
										SLC12A5	rs6073993									CTDSP2	rs10747787									UBE3C	rs6979196
										RNF150	rs7663005									RBM12	rs11696527									ST18	rs4873639
										AHRR	rs2241598									MBNL2	rs9516904									ProSAPiP1	rs2295547
										HEG1	rs816151									SERF2	rs11070408									ZFYVE16	rs259043
										MIB1	rs9966717									KCNMB2	rs11714907									RAPGEF5	rs1859742
										SIPA1L2	rs12030201									NCOA2	rs10504473									MAML1	rs4700839
										KIAA1409	rs11160135									SEMA4D	rs3211669									KIAA0133	rs6701445
										USP28	rs2459970									GLRX3	rs2244309									RHOBTB1	rs10994530
										TMEM16H	rs1864116									SPTLC1	rs16908135									RICH2	rs3213687
										NEUROD4	rs1857764									SLC35A1	rs11965562									HNRPDL	rs11722069
										PROL1	rs17713792									SLC19A2	rs1517744									PDCD6	rs1053477
										RRAGD	rs11965563									PAIP1	rs3776423									INSL5	rs604737
										SLC5A7	rs7604041									DMRT2	rs1890838									RANBP9	rs365178
										MUTED	rs2815160									LBX1	rs12771487									GJC1	rs4369727
										NECAB3	rs12481237									FUT9	rs2799633									ABCC9	rs4148677
										PRDM16	rs2651906									NRG3	rs1923560									EDIL3	rs11948928
										CSMD1	rs7834964									JARID1B	rs3196669									CTDSP2	rs10747787
										GIGYF1	rs12673102									AHCYL1	rs2174309									FRY	rs433551
										ATPAF1	rs2275380									ZMYND11	rs7870040									RBM12	rs11696527
										FAM59A	rs10502584									FRS2	rs10878977									MBNL2	rs9516904
										2014-03-07	rs2303552									PPARGC1A	rs3796407									SERF2	rs11070408
										C1orf80	rs4846777									RALBP1	rs7232664									KCNMB2	rs11714907
										OBFC2A	rs12617759									GLIPR1	rs3741495									NCOA2	rs10504473
										GRAMD3	rs11241882									TMSL8	NaN									SEMA4D	rs3211669
										VKORC1	rs749671									KDELR3	rs196054									GLRX3	rs2244309
										DHX40	rs10083838									RAB35	rs2286050									SPTLC1	rs16908135
										PARP8	rs6450183									VAX1	rs1898354									SLC35A1	rs11965562
										VASH2	rs6679848									POLS	rs2288446									SLC19A2	rs1517744
										LONRF3	NaN									CPSF6	rs11177543									PAIP1	rs3776423
										C20orf39	rs11697115									C9orf7	rs1054379									DMRT2	rs1890838
										LRRTM4	rs11689077									BAZ2A	rs2255074									CUGBP2	rs17444979
										CHD9	rs9940848									BAZ1A	rs12878219									LBX1	rs12771487
										NUBPL	rs12436891									WIF1	rs7302095									FUT9	rs2799633
										PLEKHO2	rs8027676									AKAP2	rs10816922									NRG3	rs1923560
										JHDM1D	rs4725655									RASSF8	rs10771260									JARID1B	rs3196669
										TXNDC1	rs3007165									KLF12	rs1184596									AHCYL1	rs2174309
										TXNDC5	rs9405357									STK38	rs16888605									ZMYND11	rs7870040
										NETO1	rs9964966									CTRC	rs542008									FRS2	rs10878977
										FAM108A1	rs4807163									ICK	rs9296698									PPARGC1A	rs3796407
										CHST9	rs163057									KIAA0831	rs7141290									RALBP1	rs7232664
										SPATA16	rs12486238									KIAA0907	rs4661175									GLIPR1	rs3741495
										STK40	rs3806289									ZNF365	rs7073867									TMSL8	NaN
										CTTNBP2	rs10235887									RP4-691N24.1	rs6037166									KDELR3	rs196054
										C2orf7	rs6546815									STK38L	rs10842902									RAB35	rs2286050
										GLIS2	rs804175									AOF2	rs2765854									VAX1	rs1898354
										USP30	rs4964776									TNRC6B	rs11914082									POLS	rs2288446
										PTPN5	rs4073915									NFASC	rs17415523									CPSF6	rs11177543
										AIFM2	rs2894111									ZC3H3	rs11136295									C9orf7	rs1054379
										ADO	rs1509963									GRAMD4	rs17589429									BAZ2A	rs2255074
										ABHD13	rs1931356									EFR3A	rs7840213									BAZ1A	rs12878219
										JUB	rs11845708									UBXD2	rs3795901									WIF1	rs7302095
										SCRT2	rs6053993									FBXL7	rs13185548									AKAP2	rs10816922
										PHLDB2	rs9840340									ATP11B	rs6788905									RASSF8	rs10771260
										IFT20	rs9894260									MLC1	rs137880									KLF12	rs1184596
										L3MBTL4	rs8084935									SULF1	rs752039									STK38	rs16888605
										YTHDC1	rs11942344									TBC1D1	rs13107094									CTRC	rs542008
										ZNF804A	rs10206265									TBC1D12	rs1889486									ICK	rs9296698
										MTDH	rs2512429									PLCB1	rs4813863									KIAA0831	rs7141290
										FNIP1	rs6596034									ANKRD28	rs9832792									KIAA0907	rs4661175
										SLC35A4	rs7712617									ANKRD12	rs11660603									ZNF365	rs7073867
										DTX2	rs6965668									CLEC16A	rs11645951									RP4-691N24.1	rs6037166
										PALM2	rs10980097									MGRN1	rs10500325									STK38L	rs10842902
										ELFN2	rs4821661									ACSL6	rs804059									AOF2	rs2765854
										TMEM132B	rs10846882									SATB2	rs12053525									TNRC6B	rs11914082
										GALNT13	rs707108									RPGRIP1L	rs1946155									NFASC	rs17415523
										C1QTNF3	rs12659370									ARHGEF18	rs11882682									ZC3H3	rs11136295
										FBXO32	rs4541894									AHCYL2	rs1077483									GRAMD4	rs17589429
										C20orf108	rs3827103									ZFPM2	rs6999452									EFR3A	rs7840213
										CYYR1	rs2830234									TDRD7	rs4313271									UBXD2	rs3795901
										FAT3	rs16917246									GRIP1	rs10506492									FBXL7	rs13185548
										FLJ25006	rs34351158									TARDBP	rs2273346									ATP11B	rs6788905
										SLC43A2	rs4790653									HEY2	rs6940469									MLC1	rs137880
										AP1S3	rs16865110									KIAA0240	rs2268684									SULF1	rs752039
										JMY	rs1291041									SUZ12	rs9906443									TBC1D1	rs13107094
										HDX	NaN									AMACR	rs2113097									TBC1D12	rs1889486
										DYDC1	rs11202832									CD2AP	rs6938470									PLCB1	rs4813863
										FAM76B	rs1266574									SSBP3	rs7536329									ANKRD28	rs9832792
										SPTY2D1	rs10832962									PRKD3	rs10170761									ANKRD12	rs11660603
										THSD3	rs4223									BRD1	rs11703411									CLEC16A	rs11645951
										TMEM56	rs4950076									BCL2L13	rs4488761									CSTF2T	rs7896914
										SNF1LK	rs162386									HYPK	rs11070408									MGRN1	rs10500325
										ALS2CR13	rs7577225									GCA	rs4664464									ACSL6	rs804059
										FAM84A	rs2675901									NIPBL	rs168662									SATB2	rs12053525
										C14orf83	rs17184650									ABI3BP	rs9877253									RPGRIP1L	rs1946155
										DENND1B	rs1775468									ZDHHC5	rs11229080									ARHGEF18	rs11882682
										MIER3	rs832540									FAM98A	rs13391166									AHCYL2	rs1077483
										EIF2C4	rs12725400									C2CD2	rs2839401									ZFPM2	rs6999452
										SUSD3	rs3934851									NECAP1	rs10772929									TDRD7	rs4313271
										ZNF449	NaN									GORASP2	rs6755814									GRIP1	rs10506492
										FLJ90650	rs1560079									OSBPL3	rs41459253									TARDBP	rs2273346
										LOC219854	rs606567									C20orf26	rs2424306									PHF3	rs6914590
										DOK6	rs10871655									SEZ6L2	rs7201384									HEY2	rs6940469
										C7orf28B	rs17789894									EIF2C1	rs12725400									KIAA0240	rs2268684
										SPDYA	rs4666116									NBEA	rs9565359									SUZ12	rs9906443
										FNDC5	rs7527330									CHORDC1	rs10734123									AMACR	rs2113097
										MSRB3	rs1370938									D4S234E	rs4402980									CD2AP	rs6938470
										TMEM188	rs13335101									SERP1	rs4533673									SSBP3	rs7536329
										GK5	rs9877817									PDLIM3	rs11132328									PRKD3	rs10170761
										PLCXD2	rs9840340									TOR1B	rs10988496									BRD1	rs11703411
										LOC283152	rs641382									DEXI	rs16957899									BCL2L13	rs4488761
										RCOR2	rs10897454									HIPK2	rs10226879									HYPK	rs11070408
										GLT8D3	rs10785333									KLF15	rs11929100									GCA	rs4664464
										FAM126B	rs10194347									LRP12	rs3018437									NIPBL	rs168662
										ZNF619	rs9882171									ZNF295	rs220215									ABI3BP	rs9877253
										SH3PXD2B	rs7724869									TMED5	rs17131710									ZDHHC5	rs11229080
										FAM78A	rs2050243									ZBTB7B	rs10908445									FAM98A	rs13391166
										C9orf150	rs10491739									ABHD5	rs1482651									C2CD2	rs2839401
										MGC39900	NaN									METTL9	rs8045456									NECAP1	rs10772929
										LUZP2	rs16912792									CYB5R4	rs16873803									GORASP2	rs6755814
										ZNF710	rs950116									PHF20	rs17093182									OSBPL3	rs41459253
										MIA3	rs1890070									PRR16	rs7710004									C20orf26	rs2424306
										ZC3H6	rs41480847									ZBTB7A	rs2379623									WSB1	rs11870888
										C6orf204	rs1771754									MBTPS2	NaN									KLHL3	rs7709766
										LOC388969	rs17026540									RNF138	rs16962701									SEZ6L2	rs7201384
										PALM2-AKAP2	rs10980097									DCDC2	rs7738943									EIF2C1	rs12725400
										SNHG3-RCC1	rs11247811									C20orf111	rs6017279									NBEA	rs9565359
										RP11-679B17.1	rs566568									TRMT6	rs236110									CHORDC1	rs10734123
																				C7orf28A	rs28404743									D4S234E	rs4402980
																				EMCN	rs2116991									SERP1	rs4533673
																				SELT	rs4533673									PDLIM3	rs11132328
																				ARID4B	rs6699644									TOR1B	rs10988496
																				ZAK	rs1530591									FAM152B	rs9623433
																				CLDN22	rs17294373									DEXI	rs16957899
																				C21orf91	rs8131431									HIPK2	rs10226879
																				RBM27	rs13171939									KLF15	rs11929100
																				SASH3	NaN									LRP12	rs3018437
																				TAF7L	NaN									ZNF295	rs220215
																				XRN1	rs9867210									TMED5	rs17131710
																				PLEKHA5	rs2970843									ZBTB7B	rs10908445
																				HMGCLL1	rs9367641									ABHD5	rs1482651
																				SGTB	rs16894342									METTL9	rs8045456
																				LEPROT	rs9326066									CYB5R4	rs16873803
																				C1orf26	rs2378958									PHF20	rs17093182
																				C10orf26	rs7907703									PRR16	rs7710004
																				SNRK	rs6793392									ZBTB7A	rs2379623
																				FNBP1L	rs698927									MBTPS2	NaN
																				ZCCHC2	rs8097062									RNF138	rs16962701
																				BCOR	NaN									DCDC2	rs7738943
																				ELOVL2	rs6906360									C20orf111	rs6017279
																				RASIP1	rs601338									TRMT6	rs236110
																				STX17	rs2698999									C7orf28A	rs28404743
																				OXR1	rs28921419									EMCN	rs2116991
																				C8orf32	rs13248008									SELT	rs4533673
																				RIC8B	rs3782709									ARID4B	rs6699644
																				APPL2	rs4964359									ZAK	rs1530591
																				SBNO1	rs1879379									CLDN22	rs17294373
																				C11orf57	rs1320664									C21orf91	rs8131431
																				RAVER2	rs12402976									GPR85	rs10279164
																				C20orf20	rs4081327									RBM27	rs13171939
																				PGM2	rs17424129									SASH3	NaN
																				MCOLN3	rs17121776									TAF7L	NaN
																				RBM41	NaN									XRN1	rs9867210
																				FBXW7	rs7686797									PLEKHA5	rs2970843
																				STRBP	rs10985938									HMGCLL1	rs9367641
																				IMPACT	rs10163707									SGTB	rs16894342
																				TMEM55A	rs7828122									LEPROT	rs9326066
																				PPP1R9A	rs1326152									DIRAS2	rs753593
																				ZNF280C	NaN									C1orf26	rs2378958
																				OSGEP	rs1009310									C10orf26	rs7907703
																				CDC37L1	rs407872									SNRK	rs6793392
																				SMEK1	rs1285838									FNBP1L	rs698927
																				LMBR1L	rs2241726									ZCCHC2	rs8097062
																				BDP1	rs3748041									BCOR	NaN
																				CISD1	rs2153281									ELOVL2	rs6906360
																				ERBB2IP	rs16894391									RASIP1	rs601338
																				NXT2	NaN									STX17	rs2698999
																				CTTNBP2NL	rs1343275									OXR1	rs28921419
																				BAIAP2L1	rs2394854									C8orf32	rs13248008
																				RP5-1022P6.2	rs805755									RIC8B	rs3782709
																				C11orf30	rs750801									APPL2	rs4964359
																				C14orf124	rs712487									SBNO1	rs1879379
																				CEACAM19	rs2965157									C11orf57	rs1320664
																				SLC17A6	rs11026477									RAVER2	rs12402976
																				PHTF2	rs9691803									C20orf20	rs4081327
																				ATP10A	rs1373564									PGM2	rs17424129
																				RCN3	rs35538484									MCOLN3	rs17121776
																				ABHD6	rs12632456									RBM41	NaN
																				SLC12A5	rs6073993									FBXW7	rs7686797
																				RNF150	rs7663005									STRBP	rs10985938
																				AHRR	rs2241598									IMPACT	rs10163707
																				HEG1	rs816151									TMEM55A	rs7828122
																				GPR158	rs1591250									CDCA7L	rs13242846
																				MIB1	rs9966717									PPP1R9A	rs1326152
																				SIPA1L2	rs12030201									ZNF280C	NaN
																				KIAA1409	rs11160135									FLVCR2	rs3784004
																				KIAA1432	rs7025291									OSGEP	rs1009310
																				USP36	rs3744787									CDC37L1	rs407872
																				USP28	rs2459970									SMEK1	rs1285838
																				CALCOCO1	rs4759285									LMBR1L	rs2241726
																				TMEM16H	rs1864116									BDP1	rs3748041
																				NEUROD4	rs1857764									CISD1	rs2153281
																				PROL1	rs17713792									ERBB2IP	rs16894391
																				DMRT3	rs12115486									NXT2	NaN
																				RRAGD	rs11965563									CTTNBP2NL	rs1343275
																				SLC5A7	rs7604041									BAIAP2L1	rs2394854
																				HAPLN2	rs12760461									RP5-1022P6.2	rs805755
																				MUTED	rs2815160									C11orf30	rs750801
																				NECAB3	rs12481237									C14orf124	rs712487
																				PRDM16	rs2651906									CEACAM19	rs2965157
																				HERPUD2	rs4483064									SLC17A6	rs11026477
																				CSMD1	rs7834964									PHTF2	rs9691803
																				GIGYF1	rs12673102									KIAA1147	rs9942597
																				NUCKS1	rs708725									ATP10A	rs1373564
																				ATPAF1	rs2275380									RCN3	rs35538484
																				RAI16	rs2306643									ABHD6	rs12632456
																				FAM59A	rs10502584									SLC12A5	rs6073993
																				ELOVL1	rs2782643									RNF150	rs7663005
																				2014-03-07	rs2303552									AHRR	rs2241598
																				C1orf80	rs4846777									HEG1	rs816151
																				OBFC2A	rs12617759									GPR158	rs1591250
																				NT5DC2	rs6445528									MIB1	rs9966717
																				TMEM135	rs991773									SIPA1L2	rs12030201
																				SPATS2	rs2236746									KIAA1409	rs11160135
																				GRAMD3	rs11241882									KIAA1432	rs7025291
																				VKORC1	rs749671									USP36	rs3744787
																				DHX40	rs10083838									USP28	rs2459970
																				PARP8	rs6450183									CALCOCO1	rs4759285
																				SMC6	rs13032264									KIAA1553	rs11964270
																				C11orf61	rs7111513									TMEM16H	rs1864116
																				ZMAT4	rs4430079									RAP2C	NaN
																				ZNF385D	rs1993507									NEUROD4	rs1857764
																				VASH2	rs6679848									PROL1	rs17713792
																				LONRF3	NaN									DMRT3	rs12115486
																				THNSL1	rs1033962									RRAGD	rs11965563
																				C20orf39	rs11697115									SLC5A7	rs7604041
																				TTC26	rs17160764									HAPLN2	rs12760461
																				C12orf30	rs7965087									MUTED	rs2815160
																				LRRTM4	rs11689077									NECAB3	rs12481237
																				CHD9	rs9940848									PRDM16	rs2651906
																				NUBPL	rs12436891									HERPUD2	rs4483064
																				CEP63	rs13097818									CSMD1	rs7834964
																				EFHC2	NaN									GIGYF1	rs12673102
																				PLEKHO2	rs8027676									NUCKS1	rs708725
																				JHDM1D	rs4725655									ATPAF1	rs2275380
																				TXNDC1	rs3007165									RAI16	rs2306643
																				TXNDC5	rs9405357									FAM59A	rs10502584
																				NETO1	rs9964966									ELOVL1	rs2782643
																				FAM108A1	rs4807163									2014-03-07	rs2303552
																				CABLES2	rs1321353									C1orf80	rs4846777
																				CHST9	rs163057									OBFC2A	rs12617759
																				SNX25	rs1288535									NT5DC2	rs6445528
																				SPATA16	rs12486238									TMEM135	rs991773
																				STK40	rs3806289									SPATS2	rs2236746
																				CTTNBP2	rs10235887									GRAMD3	rs11241882
																				C2orf7	rs6546815									VKORC1	rs749671
																				GLIS2	rs804175									DHX40	rs10083838
																				USP30	rs4964776									PARP8	rs6450183
																				AGPAT9	rs6845316									SMC6	rs13032264
																				PTPN5	rs4073915									C11orf61	rs7111513
																				ADO	rs1509963									ZMAT4	rs4430079
																				TMEM87B	rs10169022									ZNF385D	rs1993507
																				ABHD13	rs1931356									VASH2	rs6679848
																				JUB	rs11845708									LONRF3	NaN
																				SCRT2	rs6053993									THNSL1	rs1033962
																				PHLDB2	rs9840340									C20orf39	rs11697115
																				IFT20	rs9894260									TTC26	rs17160764
																				L3MBTL4	rs8084935									C12orf30	rs7965087
																				SLC39A13	rs4992357									LRRTM4	rs11689077
																				YTHDC1	rs11942344									CHD9	rs9940848
																				ZNF804A	rs10206265									NUBPL	rs12436891
																				MTDH	rs2512429									CEP63	rs13097818
																				MGC21874	rs7670187									EFHC2	NaN
																				FOXP2	rs17137182									PLEKHO2	rs8027676
																				FNIP1	rs6596034									JHDM1D	rs4725655
																				SLC35A4	rs7712617									TXNDC1	rs3007165
																				PALM2	rs10980097									TXNDC5	rs9405357
																				MBD6	rs899653									NETO1	rs9964966
																				FMNL2	rs2346205									FAM108A1	rs4807163
																				ELFN2	rs4821661									CABLES2	rs1321353
																				TMEM132B	rs10846882									CHST9	rs163057
																				GALNT13	rs707108									SNX25	rs1288535
																				C1QTNF3	rs12659370									SPATA16	rs12486238
																				FBXO32	rs4541894									STK40	rs3806289
																				FOXP4	rs10947972									CTTNBP2	rs10235887
																				C20orf108	rs3827103									C2orf7	rs6546815
																				CYYR1	rs2830234									GLIS2	rs804175
																				FAT3	rs16917246									USP30	rs4964776
																				TMEM16D	rs7960388									AGPAT9	rs6845316
																				FRMD6	rs4898688									PTPN5	rs4073915
																				JDP2	rs10146130									AIFM2	rs2894111
																				FLJ25006	rs34351158									ADO	rs1509963
																				SLC43A2	rs4790653									TMEM87B	rs10169022
																				AP1S3	rs16865110									ABHD13	rs1931356
																				PABPC4L	rs17622605									JUB	rs11845708
																				JMY	rs1291041									SCRT2	rs6053993
																				VPS37A	rs2023628									PHLDB2	rs9840340
																				PIP5KL1	rs7859									IFT20	rs9894260
																				HDX	NaN									L3MBTL4	rs8084935
																				DYDC1	rs11202832									SLC39A13	rs4992357
																				FAM76B	rs1266574									YTHDC1	rs11942344
																				E2F7	rs310792									ZNF804A	rs10206265
																				THSD3	rs4223									MTDH	rs2512429
																				C14orf145	rs328239									MGC21874	rs7670187
																				FAM81A	rs4775165									FOXP2	rs17137182
																				TMED6	rs9935533									FNIP1	rs6596034
																				MGAT5B	rs655690									SLC35A4	rs7712617
																				TMEM56	rs4950076									DTX2	rs6965668
																				SNF1LK	rs162386									PALM2	rs10980097
																				ALS2CR13	rs7577225									MBD6	rs899653
																				FAM84A	rs2675901									FMNL2	rs2346205
																				PAQR3	rs3822107									ELFN2	rs4821661
																				C14orf83	rs17184650									TMEM132B	rs10846882
																				DENND1B	rs1775468									GALNT13	rs707108
																				KANK4	rs6675459									C1QTNF3	rs12659370
																				MIER3	rs832540									FBXO32	rs4541894
																				EIF2C4	rs12725400									FOXP4	rs10947972
																				RWDD4A	rs4861566									C20orf108	rs3827103
																				SUSD3	rs3934851									CYYR1	rs2830234
																				ZNF449	NaN									FAT3	rs16917246
																				LOC203547	NaN									TMEM16D	rs7960388
																				C3orf58	rs6782974									FRMD6	rs4898688
																				FLJ90650	rs1560079									JDP2	rs10146130
																				LOC219854	rs606567									FLJ25006	rs34351158
																				RNF152	rs8085961									SLC43A2	rs4790653
																				C6orf65	rs1903332									AP1S3	rs16865110
																				C7orf28B	rs17789894									PABPC4L	rs17622605
																				SPDYA	rs4666116									JMY	rs1291041
																				FNDC5	rs7527330									VPS37A	rs2023628
																				MSRB3	rs1370938									PIP5KL1	rs7859
																				EHBP1L1	rs10896012									HDX	NaN
																				ELMOD2	rs3104104									DYDC1	rs11202832
																				TMEM188	rs13335101									FAM76B	rs1266574
																				MGC33894	rs4986003									SPTY2D1	rs10832962
																				GK5	rs9877817									E2F7	rs310792
																				PLCXD2	rs9840340									THSD3	rs4223
																				LOC283152	rs641382									C14orf145	rs328239
																				RCOR2	rs10897454									FAM81A	rs4775165
																				GLT8D3	rs10785333									TMED6	rs9935533
																				SLC46A3	rs17560110									MGAT5B	rs655690
																				ZNF326	rs17498595									TMEM56	rs4950076
																				FAM126B	rs10194347									SNF1LK	rs162386
																				ZNF619	rs9882171									ALS2CR13	rs7577225
																				SH3PXD2B	rs7724869									FAM84A	rs2675901
																				FAM78A	rs2050243									PAQR3	rs3822107
																				C9orf150	rs10491739									C14orf83	rs17184650
																				MGC39900	NaN									DENND1B	rs1775468
																				KLHL10	rs17498875									KANK4	rs6675459
																				LUZP2	rs16912792									MIER3	rs832540
																				NAP5	rs4953865									EIF2C4	rs12725400
																				ZNF710	rs950116									RWDD4A	rs4861566
																				MIA3	rs1890070									SUSD3	rs3934851
																				ZC3H6	rs41480847									ZNF449	NaN
																				C6orf204	rs1771754									LOC203547	NaN
																				C9orf128	rs13301140									C3orf58	rs6782974
																				RGS7BP	rs876355									FLJ90650	rs1560079
																				hCG_1651889	rs11980741									LOC219854	rs606567
																				MXRA7	rs2240774									DOK6	rs10871655
																				PALM2-AKAP2	rs10980097									RNF152	rs8085961
																				SNHG3-RCC1	rs11247811									C6orf65	rs1903332
																				RELL1	rs17424129									LEMD2	rs12203688
																				RP11-679B17.1	rs566568									C7orf28B	rs17789894
																														SPDYA	rs4666116
																														FNDC5	rs7527330
																														MSRB3	rs1370938
																														YTHDF3	rs9969662
																														EHBP1L1	rs10896012
																														ELMOD2	rs3104104
																														TMEM188	rs13335101
																														MGC33894	rs4986003
																														GK5	rs9877817
																														PLCXD2	rs9840340
																														LOC283152	rs641382
																														RCOR2	rs10897454
																														GLT8D3	rs10785333
																														SLC46A3	rs17560110
																														ZNF326	rs17498595
																														FAM126B	rs10194347
																														ZNF619	rs9882171
																														SH3PXD2B	rs7724869
																														RGMB	rs1967318
																														FAM78A	rs2050243
																														C9orf150	rs10491739
																														MGC39900	NaN
																														KLHL10	rs17498875
																														LUZP2	rs16912792
																														NAP5	rs4953865
																														ZNF710	rs950116
																														MIA3	rs1890070
																														ZC3H6	rs41480847
																														C6orf204	rs1771754
																														LOC388969	rs17026540
																														C9orf128	rs13301140
																														RGS7BP	rs876355
																														hCG_1651889	rs11980741
																														MXRA7	rs2240774
																														PALM2-AKAP2	rs10980097
																														SNHG3-RCC1	rs11247811
																														RELL1	rs17424129
																														RP11-679B17.1	rs566568
